# Supplementary material for: Transparency and reporting characteristics of COVID-19 randomized controlled trials
Source: bioRxiv or medRxiv preprint supplement (doi:10.1101/2022.02.03.22270357), 2022-02-04
Supplement: Supplementary file [file media-1.pdf]

**Figure 1. Flowchart of included randomized controlled trials (RCTs) (last search date May 31, 2021)**

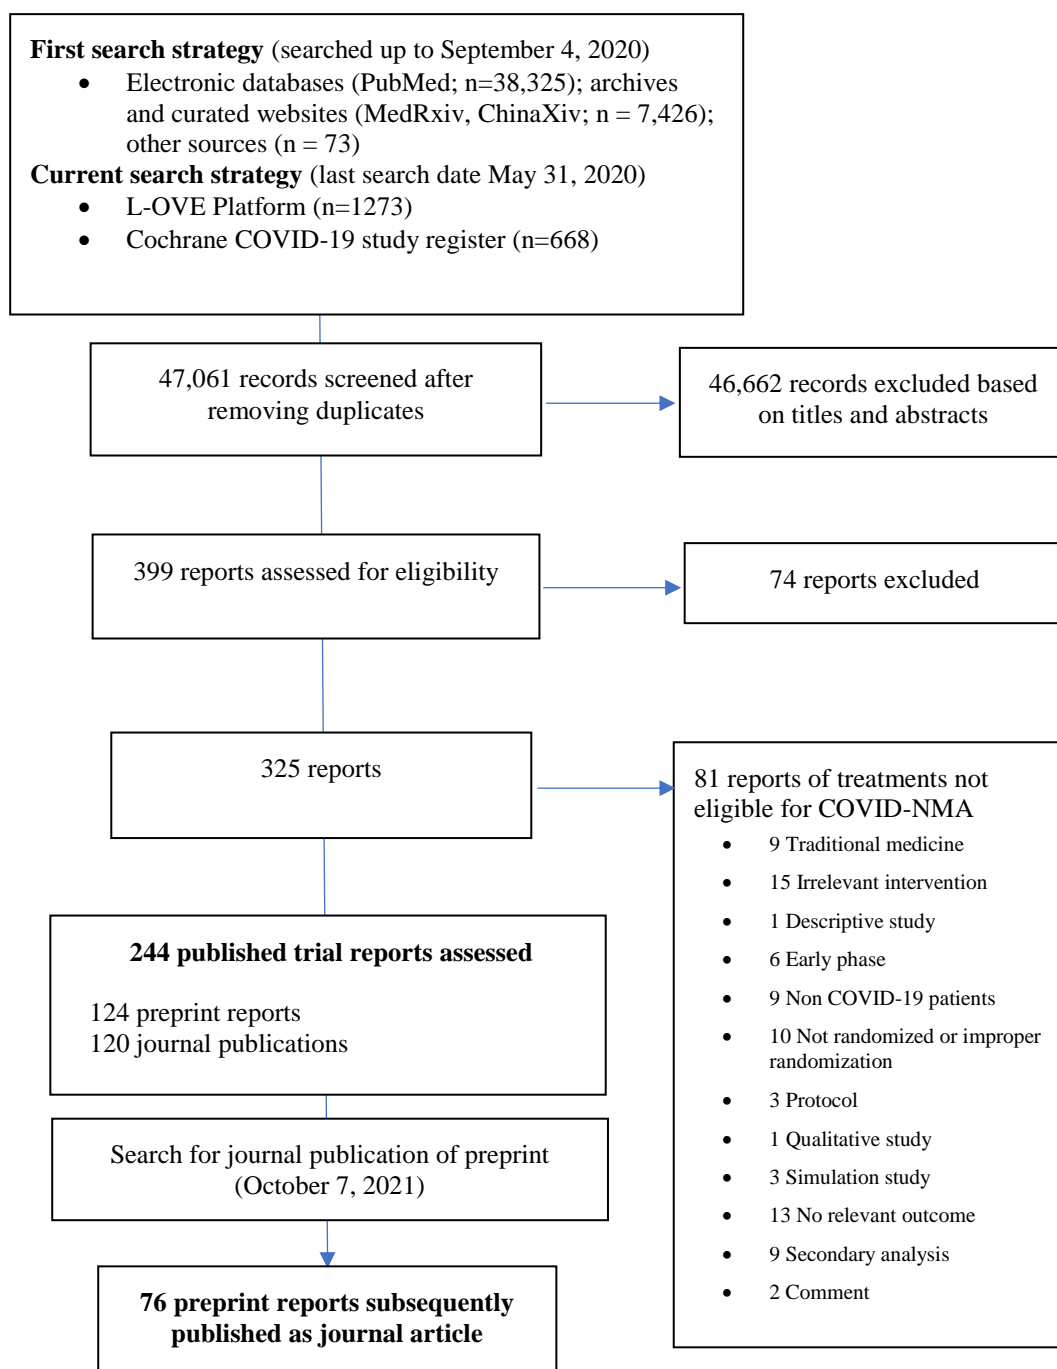

COVID-NMA is a living systematic review of all trials assessing treatment and preventive interventions for COVID-19.  
ICTRP: World Health Organization (WHO) International Clinical Trials Registry Platform
