# Supplementary material for: Transparency and reporting characteristics of COVID-19 randomized controlled trials
Source: bioRxiv or medRxiv preprint supplement (doi:10.1101/2022.02.03.22270357), 2022-02-04
Supplement: Supplementary file [file media-2.pdf]

**S1 Table. Current search strategy (COVID-NMA)**

|                   |                                                                                                                                                                                                                                                                                                                                                                                                                                                                                                                                                                                                                                                                                                                                                                             |
|-------------------|-----------------------------------------------------------------------------------------------------------------------------------------------------------------------------------------------------------------------------------------------------------------------------------------------------------------------------------------------------------------------------------------------------------------------------------------------------------------------------------------------------------------------------------------------------------------------------------------------------------------------------------------------------------------------------------------------------------------------------------------------------------------------------|
| <b>PubMed</b>     | (2019 nCoV[tiab] OR 2019nCoV[tiab] OR corona virus[tiab] OR corona viruses[tiab] OR coronavirus[tiab] OR coronaviruses[tiab] OR COVID[tiab] OR COVID19[tiab] OR nCov 2019[tiab] OR SARSCoV2[tiab] OR SARS CoV-2[tiab] OR SARSCoV2[tiab] OR SARSCoV-2[tiab] OR "COVID-19"[Mesh] OR "COVID-19 Testing"[Mesh] OR "COVID-19 Vaccines"[Mesh] OR "Coronavirus"[Mesh:NoExp] OR "SARS-CoV-2"[Mesh] OR "COVID-19"[nm] OR "COVID-19 drug treatment"[nm] OR "COVID-19 diagnostic testing"[nm] OR "COVID-19 serotherapy"[nm] OR "COVID-19 vaccine"[nm] OR "LAMP assay"[nm] OR "severe acute respiratory syndrome coronavirus 2"[nm] OR "spike protein, SARSCoV-2"[nm]) NOT ("animals"[mh] NOT "humans"[mh]) NOT (editorial[pt] OR newspaper article[pt])                                |
| <b>Embase.com</b> | (((('coronaviridae'/de OR 'coronavirinae'/de OR 'coronaviridae infection'/de OR 'coronavirus disease 2019'/exp OR 'coronavirus infection'/de OR 'SARS-related coronavirus'/de OR 'Severe acute respiratory syndrome coronavirus 2'/exp OR '2019 nCoV':ti,ab,kw OR 2019nCoV:ti,ab,kw OR ((corona* OR corono*) NEAR/1 (virus* OR viral* OR virinae*)):ti,ab,kw OR coronavir*:ti,ab,kw OR coronovir*:ti,ab,kw OR COVID:ti,ab,kw OR COVID19:ti,ab,kw OR HCoV*:ti,ab,kw OR 'nCov 2019':ti,ab,kw OR 'SARS CoV2':ti,ab,kw OR 'SARS CoV 2':ti,ab,kw OR SARSCoV2:ti,ab,kw OR 'SARSCoV 2':ti,ab,kw) NOT (('animal experiment'/de OR 'animal'/exp) NOT ('human'/exp OR 'human experiment'/de))) NOT 'editorial'/it) NOT ([medline]/lim OR [pubmed-not-medline]/lim) AND [1-12-2019]/sd |
| <b>CENTRAL</b>    | ("2019 nCoV" OR 2019nCoV OR "corona virus*" OR coronavirus* OR COVID OR COVID19 OR "nCov 2019" OR "SARS-CoV2" OR "SARS CoV-2" OR SARSCoV2 OR "SARSCoV-2"):TI,AB AND CENTRAL:TARGET 2 Coronavirus:MH AND CENTRAL:TARGET 3 Coronavirus:EH AND CENTRAL:TARGET 4 #1 OR #2 OR #3 5 2019 TO 2021:YR AND CENTRAL:TARGET 6 #5 AND #4 7 INSEGMENT 8 #6 NOT #7                                                                                                                                                                                                                                                                                                                                                                                                                        |

**S2 Table. Completeness of reporting of CONSORT sub-items (N=244)**

| CONSORT Section                                          | Checklist item                                                                                                                                                                            | Reported N (%) |
|----------------------------------------------------------|-------------------------------------------------------------------------------------------------------------------------------------------------------------------------------------------|----------------|
| <b>Section 6a</b>                                        |                                                                                                                                                                                           |                |
| Clear primary outcome                                    | Was the primary outcome(s) clearly identified (e.g., the primary/main outcome was pain)?                                                                                                  | 219 (90%)      |
| Variable of interest                                     | The variable of interest (e.g., pain, all-cause mortality)                                                                                                                                | 216 (89%)      |
| How the outcome was assessed                             | How the outcome was assessed (e.g., VAS, Beck Depression Inventory score, pain scale)                                                                                                     | 189 (77%)      |
| The analysis metric                                      | The analysis metric (e.g., change from baseline, final value, time to event)                                                                                                              | 214 (88%)      |
| The summary measure for each study group                 | The summary measure for each study group (e.g., mean, proportion with score > 2)                                                                                                          | 183 (75%)      |
| Time point of interest for analysis                      | Time point of interest for analysis (e.g., 3 months)*NA if <i>survival analysis</i>                                                                                                       | 195 (80%)      |
| Who assessed the outcome                                 | Who assessed the outcome (e.g., the patient, doctor, nurse, caregiver, other)                                                                                                             | 94 (39%)       |
| <b>Section 8a and 9</b>                                  |                                                                                                                                                                                           |                |
| Method of sequence generation                            | Method used to generate the random allocation sequence                                                                                                                                    | 201 (82%)      |
| Mechanism allocation concealment                         | Mechanism used to implement the random allocation sequence (e.g., sequentially numbered containers), describing any steps taken to conceal the sequence until interventions were assigned | 139 (57%)      |
| <b>Section 11b (N=107)</b>                               |                                                                                                                                                                                           |                |
| Who was blinded                                          | Was the study blinded?                                                                                                                                                                    | 74 (69%)       |
| How the blinding was performed                           | Who (i.e., participants, healthcare providers, data collectors, outcome adjudicators, and data analysts) was blinded to treatment assignments?                                            | 87 (81%)       |
| Similarities of the characteristics of the interventions | How was the blinding performed? (e.g., used of placebo, intervention by physician unaware of the study)                                                                                   | 49 (46%)       |

**S2 Table. (continued).**

| CONSORT Section                            | Checklist item                                                                                                                                                                            | Reported N (%) |
|--------------------------------------------|-------------------------------------------------------------------------------------------------------------------------------------------------------------------------------------------|----------------|
| <b>Section 13b</b>                         |                                                                                                                                                                                           |                |
| Flow chart                                 | Did the authors report a flow chart                                                                                                                                                       | 204 (84%)      |
| Participants randomized                    | Number of participants randomized in each group                                                                                                                                           | 233 (95%)      |
| Participants who received treatment        | Number of participants who received intended treatment in each group                                                                                                                      | 204 (84%)      |
| Participants lost to follow-up             | Number of participants lost to follow-up with reasons in each group                                                                                                                       | 236 (97%)      |
| Participants who discontinued intervention | Number of participants who discontinued intervention with reasons in each group                                                                                                           | 150 (61%)      |
| Participants analyzed                      | Number of participants analyzed for the primary outcome in each group                                                                                                                     | 235 (96%)      |
| <b>Section 17a</b>                         |                                                                                                                                                                                           |                |
| Result*                                    | Result in each group (mean (SD) or number of events/N)                                                                                                                                    | 223 (91%)      |
| Difference in estimated effect             | Difference in estimated effect between groups (e.g., odds ratio (OR), risk ratio (RR), risk difference (RD), hazard ratio (HR), difference in median survival time, mean difference (MD)) | 126 (52%)      |
| Precision                                  | Precision for difference between groups (e.g., 95% CI)                                                                                                                                    | 125 (51%)      |
| <b>Section 19</b>                          |                                                                                                                                                                                           |                |
| List of harms addressed                    | How harms-related information was collected (List of harm related events that were addressed)                                                                                             | 132 (54%)      |
| Mode of data collection                    | Mode of data collection (Full description of methods used to collect the harm related information)                                                                                        | 110 (45%)      |
| Time frame of surveillance                 | Timing (description of time frame of surveillance)                                                                                                                                        | 118 (48%)      |
| Person responsible making attribution      | Attribution methods (Person responsible making attribution disclosed and whether blinding was used)                                                                                       | 94 (39%)       |
| Participant withdrawals due to harm*       | For each group, participant withdrawals due to harm                                                                                                                                       | 96 (39%)       |
| Results of each harm type*                 | Results in each group for each harms type with denominator (mean [SD] or number of events/N)                                                                                              | 189 (77%)      |
| <b>Section 23</b>                          |                                                                                                                                                                                           |                |
| Registration number                        | The registration number                                                                                                                                                                   | 223 (91%)      |

\* One trial not assessed, since only baseline data were presented. None of the pre-specified outcomes presented in the result section.

**S3 Table. Changes in CONSORT items between preprint and peer-reviewed journal publication (n=76)**

| Consort section                | Completely reported, not changed | Partially reported, not changed | Not reported, not changed | Changed to completely reported from partial | Changed to completely reported from not reported | Changed to partially reported from not reported | Changed to partially reported from complete | Changed to not reported from complete | Changed to not reported from partial |
|--------------------------------|----------------------------------|---------------------------------|---------------------------|---------------------------------------------|--------------------------------------------------|-------------------------------------------------|---------------------------------------------|---------------------------------------|--------------------------------------|
| <b>Outcome</b>                 | 26 (34%)                         | 38 (50%)                        | 3 (4%)                    | 4 (5%)                                      | 0 (0%)                                           | 2 (3%)                                          | 0 (0%)                                      | 1 (1%)                                | 2 (3%)                               |
| <b>Sequence generation</b>     | 69 (91%)                         | -                               | 4 (5%)                    | -                                           | 3 (4%)                                           | -                                               | -                                           | 0 (0%)                                | -                                    |
| <b>Allocation concealment</b>  | 49 (64%)                         | -                               | 20 (26%)                  | -                                           | 6 (8%)                                           | -                                               | -                                           | 1 (1%)                                | -                                    |
| <b>Blinding*</b>               | 15 (20%)                         | 12 (16%)                        | 1 (1%)                    | 6 (8%)                                      | 0 (0%)                                           | 0 (0%)                                          | 1 (1%)                                      | 0 (0%)                                | 0 (0%)                               |
| <b>Participant flow</b>        | 43 (57%)                         | 27 (36%)                        | 0 (0%)                    | 5 (7%)                                      | 0 (0%)                                           | 0 (0%)                                          | 1 (1%)                                      | 0 (0%)                                | 0 (0%)                               |
| <b>Outcomes and estimation</b> | 47 (62%)                         | 22 (29%)                        | 2 (3%)                    | 3 (4%)                                      | 0 (0%)                                           | 1 (1%)                                          | 1 (1%)                                      | 0 (0%)                                | 0 (0%)                               |
| <b>Harms</b>                   | 5 (7%)                           | 59 (78%)                        | 2 (3%)                    | 6 (8%)                                      | 0 (0%)                                           | 0 (0%)                                          | 1 (1%)                                      | 0 (0%)                                | 3 (4%)                               |
| <b>Registration</b>            | 73 (96%)                         | -                               | 0 (0%)                    | -                                           | 3 (4%)                                           | -                                               | -                                           | 0 (0%)                                | -                                    |
| <b>Overall</b>                 | 4 (5%)                           | 70 (92%)                        | 0 (0%)                    | 2 (3%)                                      | 0 (0%)                                           | 0 (0%)                                          | 0 (0%)                                      | 0 (0%)                                | 0 (0%)                               |

Percentages may not add up to 100% due to rounding.

\*41 trials were unblinded
